# Supplementary material for: Vitamin D3 Regulates Energy Homeostasis under Short-Term Fasting Condition in Zebrafish (Danio Rerio)
Source: MDPI journal article supplement (doi:10.3390/nu16091271), 2024-04-25
Supplement: s1 [file s1]

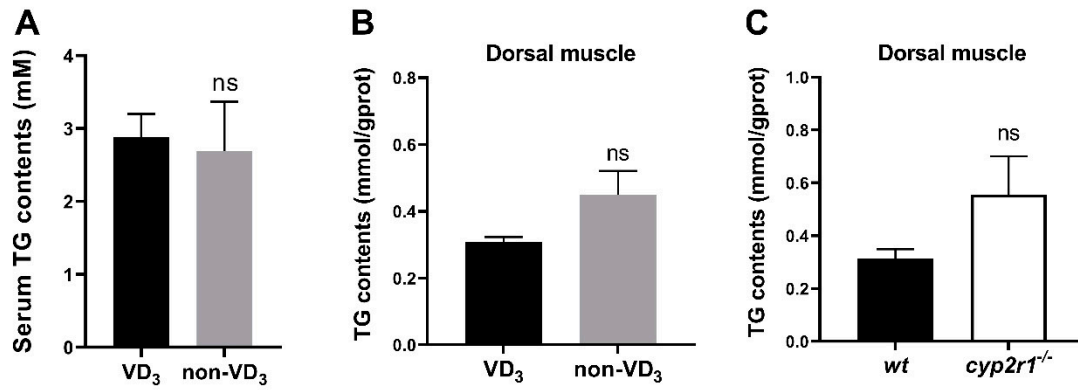

**Supplemental Figure S1. Triglyceride levels in the serum and dorsal muscle of zebrafish.** (A-B) After the feeding trial, zebrafish fed with VD<sub>3</sub> or non-VD<sub>3</sub> diet were fasted for 24 h before sampling. TG contents in the serum (A) were determined (n = 3~4 replicates, 4~5 fish/replicate), as well as dorsal muscle (B) (n = 4/group). (C) WT and *cyp2r1*<sup>-/-</sup> zebrafish at 3 mpf were fasted for 24 hours before sampling. TG contents in the dorsal muscle were determined (n = 4/genotype). ns: no statistical significance.
